# Supplementary material
Source: Springer Nature journal article supplement (https://www.springermedizin.de/resource/supplementary/12987_2012_49_MOESM2_ESM.pdf/9680738)
Supplement: MOESM2 [file 9680738]

| TJ proteins modifications               | Targeted TJ proteins                | Signaling pathway                                          | Stimulus / Diseases                           | References |
|-----------------------------------------|-------------------------------------|------------------------------------------------------------|-----------------------------------------------|------------|
| <b>Serine/Threonine Phosphorylation</b> | Cld5 (Thr207)                       | PKA                                                        | cAMP                                          | [124]      |
|                                         | Cld5, Occludin and ZO-1             | nPKC- $\theta$ / aPKC- $\zeta$                             | Hypoxia                                       | [131]      |
|                                         | N.D.                                | cPKC- $\alpha$ , cPKC- $\beta$ III , aPKC- $\lambda/\zeta$ | HIV-1 gp120                                   | [132]      |
|                                         | Cld5 (T207)<br>Occludin (T382/S507) | RhoA/Rho kinase                                            | HIV-1 encephalitis                            | [123]      |
|                                         | Cld5, Occludin, ZO-1                | RhoA / PKC- $\alpha$                                       | CCL2 chemokine                                | [142]      |
|                                         | Cld5 and Occludin                   | MLCK                                                       | Alcohol / Reactive oxygen species             | [152, 153] |
|                                         | N.D.                                |                                                            | Hypoxia / Reactive oxygen species             | [151]      |
| <b>Tyrosine Phosphorylation</b>         | Occludin                            | c-Src                                                      | Cerebral ischemia                             | [161]      |
|                                         | Occludin                            | N.D.                                                       | Glutamate                                     | [156]      |
|                                         | Cld5                                | N.D.                                                       | TGF- $\beta$                                  | [157]      |
|                                         | ZO-1                                | N.D.                                                       | Tyrosine phosphatase inhibition               | [155]      |
| <b>Down-regulation or degradation</b>   | Cld5 and Occludin Internalization   | Caveolae-dependent endocytosis                             | CCL2 chemokine                                | [172]      |
|                                         | Occludin                            | JNK, p38MAPK                                               | Amyloid- $\beta$ peptide                      | [177]      |
|                                         | Cld5                                | ERK1/2                                                     | HIV-1 Tat protein                             | [171]      |
|                                         | Occludin and ZO-1 distribution      | PLC- $\gamma$ , PI3K/Akt                                   | Hypoxia                                       | [178]      |
|                                         |                                     | N.D.                                                       |                                               | [164]      |
|                                         | Cld5                                | N.D.                                                       |                                               | [163]      |
|                                         | Cld5 and Occludin                   | VEGFR                                                      | VEGF                                          | [162]      |
|                                         | Cld3                                | N.D.                                                       | Multiple Sclerosis<br>Glioblastoma multiforme | [41]       |
|                                         | Cld5, Occludin, ZO-1                | nPKC- $\delta$                                             | Cerebral ischemia                             | [179]      |
|                                         | Occludin and ZO-1                   | MLCK                                                       | HTLV-1                                        | [154]      |
| Cld5 and Occludin                       | RhoA/RhoK                           | Reactive oxygen species                                    | [180]                                         |            |

N.D : Not Described

**Table 1:** Dysregulation of the BBB via phosphorylation or down-regulation of TJ proteins
